# Supplementary material for: The Bacterium Pantoea ananatis Modifies Behavioral Responses to Sugar Solutions in Honeybees
Source: MDPI journal article supplement (doi:10.3390/insects11100692), 2020-10-12

Figure S1

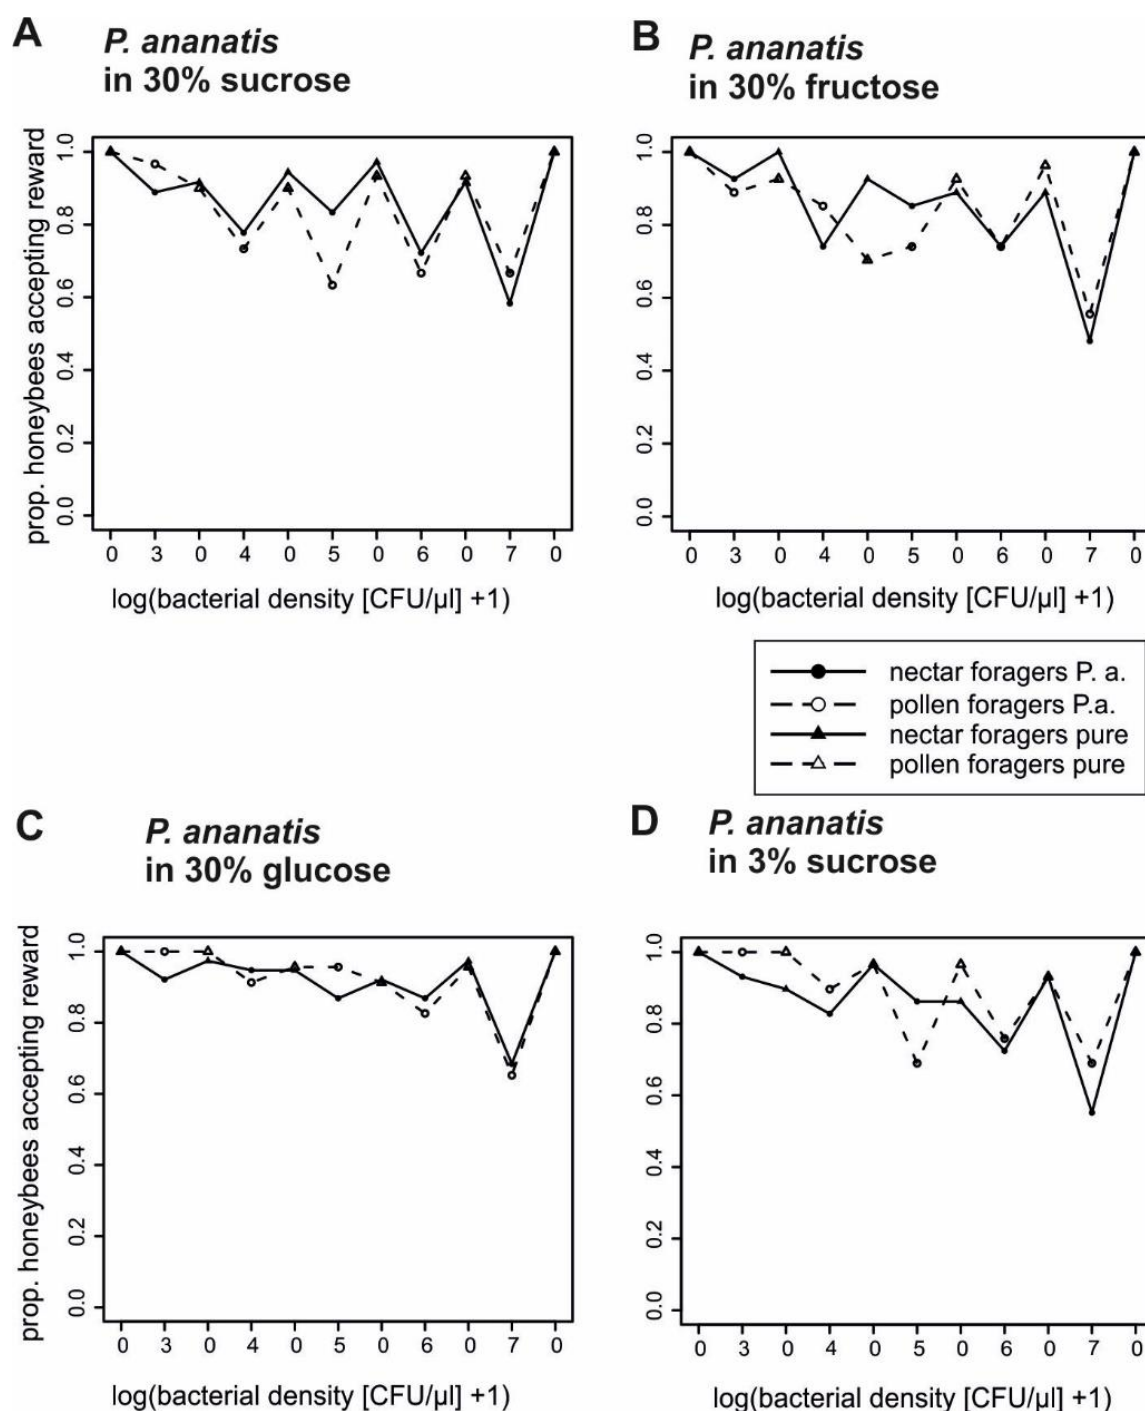

Supplement: s1 [file s1]
